# Supplementary material
Source: Research Square preprint supplement (doi:10.21203/rs.3.rs-9362498/v1)
Supplement: Supplementary file 1 [file 34bf0ae070614788fbf8bf67.docx]

**Appendix A: Excluded volume and its relation to percolation threshold**

The excluded volume is an essential item in considering the conium percolation (Balberg 2021a; Adler et al. 2009). The excluded volume of an object is defined as the volume surrounding it in which the center of another object must be located if the two objects intersect (Balberg et al. 1984; Adler et al. 2009). The product of the average excluded volume, denoted as <*V*ex>, and the number of objects per unit volume (*ρ*)

|  | (A-1) |
| --- | --- |

corresponds to the average number of connections per object (Mourzenko et al. 2005, 2011b; Thovert et al. 2017); *ρ*′ at the percolation threshold is denoted as *ρ*′*c*:

|  | (A-2) |
| --- | --- |

In other words, the percolating cluster exists when *ρ*′*>ρ*′*c*, whereas no percolating cluster exists when *ρ*′*<ρ*′*c.* This threshold *ρ*′*c* is analogous to the parameter *Bc* used in the lattice percolation (Charlaix et al. 1984; Balberg 2021a), defined as

|  | (A-3) |
| --- | --- |

where *Z* is the coordination number (i.e., the number of nearest neighbor sites in lattices), and *pcb* is the bond percolation threshold (Sahimi 2023). *Bc* has been investigated for various lattices, and is almost invariant among different percolation networks, and

|  | (A-4) |
| --- | --- |

for *d*-dimensional lattices (Sahimi 2023).

The excluded volume for two circular cracks (or discs) with vanishing thickness is analytically obtained (Onsager 1949) as

|  | (A-5) |
| --- | --- |

where *r*1 and *r*2 are the radii of the two cracks, and *γ* is the angle formed by the normal vectors of the cracks. Given that the crack orientation is independent of the crack size, the mean excluded volume is calculated as:

|  | (A-6) |
| --- | --- |

Furthermore, if the crack orientation is isotropic,

|  | (A-7) |
| --- | --- |

However, it has been suggested that the Eqs. (A-6) and (A-7), which contain the product of the mean and the second moment of the crack radius, are not adequate as an invariant for evaluating the percolation (Charlaix et al. 1984; Mourzenko et al. 2005; Adler et al. 2009). Charlaix et al. (1984) inferred that using the third moment of the radius (<*r*3>), instead of <*r*2><r>, yields a correct invariant for evaluating percolation. Mourzenko et al. (2005) demonstrated the superiority of the use of <*r*3> to obtain an invariant percolation threshold. The use of <*r*3> gives higher weights to large cracks, which seems to yield a large number of intersections, than when <*r*2><r> is used (Charlaix et al. 1984). Mourzenko et al. (2005) attributed the invariance of the percolation threshold with respect to <*r*3> to the nature of the fracture network, in which the largest fractures control connectivity. By replacing <*r*2><r> in Eqs. (A-6) and (A-7) with <*r*3> and inserting them into Eq. (A-1), one can obtain Eqs. (9) and (1), respectively.
