# Supplementary material
Source: Research Square preprint supplement (doi:10.21203/rs.3.rs-9362498/v1)
Supplement: Supplementary file 2 [file f38ddd379edec6f74be427f4.pdf]

# **Supplementary materials of Quantitative evaluation of the percolation threshold and backbone fraction of rocks with transversely isotropic cracks**

Yoshiya Usui, Earthquake Research Institute, the University of Tokyo, Tokyo, Japan  
yusui@eri.u-tokyo.ac.jp

## **Contents**

Tables S1–S4 summarize the estimates of  $\rho'_{3c}$  and  $\Delta_L$  of individual cases and their standard errors. Figure S1 illustrates the backbone fractions of the anisotropic cases in which  $\kappa=\pm 10$ ,  $a=2.7$ ,  $r_{min}/r_{max}=0.1$ , and a constant crack aspect ratio was assumed. In this figure, the curves of the backbone fractions with respect to  $\rho'_3$  are depicted, as well as the backbone fractions with respect to  $\Delta\rho'_3(=\rho'_3-\rho'_{3c})$ .

**Table S1.** Summary of  $\rho'_{3c}$  and  $\Delta_L$  for the isotropic cases (1/2). The values in parentheses are the standard errors of the estimates.

| $a$ | $r_{min}/r_{max}$ | $L/r_{max}$ | $\rho'_{3c}$  | $\Delta_L$     |
|-----|-------------------|-------------|---------------|----------------|
| –   | 1                 | 6           | 2.452 (0.011) | 0.571 (0.011)  |
|     |                   | 8           | 2.385 (0.006) | 0.411 (0.006)  |
|     |                   | 10          | 2.324 (0.004) | 0.322 (0.004)  |
|     |                   | 12          | 2.327 (0.003) | 0.294 (0.003)  |
|     |                   | 16          | 2.302 (0.002) | 0.206 (0.001)  |
| 1.8 | 0.3               | 4           | 2.572 (0.010) | 0.612 (0.009)  |
|     |                   | 5           | 2.543 (0.006) | 0.473 (0.006)  |
|     |                   | 6           | 2.434 (0.004) | 0.423 (0.004)  |
|     |                   | 7           | 2.401 (0.003) | 0.357 (0.003)  |
|     |                   | 8           | 2.398 (0.002) | 0.314 (0.002)  |
| 1.8 | 0.1               | 4           | 2.649 (0.006) | 0.633 (0.005)  |
|     |                   | 5           | 2.553 (0.003) | 0.479 (0.003)  |
|     |                   | 6           | 2.517 (0.002) | 0.422 (0.002)  |
|     |                   | 7           | 2.495 (0.002) | 0.350 (0.002)  |
|     |                   | 8           | 2.461 (0.001) | 0.319 (0.001)  |
| 1.8 | 0.03              | 4           | 2.689 (0.003) | 0.605 (0.003)  |
|     |                   | 5           | 2.555 (0.002) | 0.496 (0.002)  |
|     |                   | 6           | 2.518 (0.001) | 0.446 (0.001)  |
|     |                   | 7           | 2.474 (0.001) | 0.347 (0.001)  |
|     |                   | 8           | 2.462 (0.001) | 0.319 (0.001)  |
| 1.8 | 0.01              | 4           | 2.619 (0.002) | 0.667 (0.002)  |
|     |                   | 5           | 2.599 (0.001) | 0.501 (0.001)  |
|     |                   | 6           | 2.479 (0.001) | 0.408 (0.001)  |
|     |                   | 7           | 2.463 (0.001) | 0.382 (0.001)  |
|     |                   | 8           | 2.474 (0.001) | 0.309 (<0.001) |

**Table S2.** Summary of  $\rho'_{3c}$  and  $\Delta_L$  for the isotropic cases (2/2). The values in parentheses are the standard errors of the estimates.

| $a$ | $r_{min}/r_{max}$ | $L/r_{max}$ | $\rho'_{3c}$   | $\Delta_L$     |
|-----|-------------------|-------------|----------------|----------------|
| 2.4 | 0.1               | 4           | 2.658 (0.004)  | 0.591 (0.004)  |
|     |                   | 5           | 2.589 (0.003)  | 0.496 (0.003)  |
|     |                   | 6           | 2.531 (0.002)  | 0.402 (0.002)  |
|     |                   | 7           | 2.520 (0.001)  | 0.344 (0.001)  |
|     |                   | 8           | 2.491 (0.001)  | 0.299 (0.001)  |
| 2.7 | 0.1               | 4           | 2.706 (0.003)  | 0.576 (0.003)  |
|     |                   | 5           | 2.602 (0.002)  | 0.464 (0.002)  |
|     |                   | 6           | 2.563 (0.001)  | 0.378 (0.001)  |
|     |                   | 7           | 2.535 (0.001)  | 0.324 (0.001)  |
|     |                   | 8           | 2.497 (0.001)  | 0.278 (0.001)  |
| 3.0 | 0.1               | 4           | 2.692 (0.003)  | 0.526 (0.003)  |
|     |                   | 5           | 2.610 (0.002)  | 0.421 (0.002)  |
|     |                   | 6           | 2.590 (0.001)  | 0.358 (0.001)  |
|     |                   | 7           | 2.537 (0.001)  | 0.315 (0.001)  |
|     |                   | 8           | 2.530 (0.001)  | 0.271 (0.001)  |
| 3.6 | 0.1               | 4           | 2.666 (0.002)  | 0.433 (0.002)  |
|     |                   | 5           | 2.630 (0.001)  | 0.372 (0.001)  |
|     |                   | 6           | 2.606 (0.001)  | 0.286 (0.001)  |
|     |                   | 7           | 2.556 (0.001)  | 0.251 (0.001)  |
|     |                   | 8           | 2.580 (<0.001) | 0.224 (<0.001) |

**Table S3.** Summary of  $\rho'_{3c}$  and  $\Delta_L$  for the anisotropic cases (1/2). For all cases,  $r_{min}/r_{max} = 0.1$ . The values in parentheses are the standard errors of the estimates. The z-axis corresponds to the symmetric axis of the transverse isotropy of the crack orientation.

| $a$ | $\kappa$ | $L/r_{max}$ | $\rho'_{3c}$<br>(z-axis) | $\Delta_L$<br>(z-axis) | $\rho'_{3c}$<br>(x-axis) | $\Delta_L$<br>(x-axis) |
|-----|----------|-------------|--------------------------|------------------------|--------------------------|------------------------|
| 1.8 | -10      | 4           | 2.153 (0.005)            | 0.565 (0.005)          | 2.858 (0.005)            | 0.623 (0.005)          |
|     |          | 5           | 2.116 (0.003)            | 0.459 (0.003)          | 2.730 (0.003)            | 0.497 (0.003)          |
|     |          | 6           | 2.170 (0.002)            | 0.396 (0.002)          | 2.629 (0.002)            | 0.424 (0.002)          |
|     |          | 7           | 2.173 (0.002)            | 0.366 (0.002)          | 2.573 (0.002)            | 0.354 (0.002)          |
|     |          | 8           | 2.183 (0.001)            | 0.310 (0.001)          | 2.542 (0.001)            | 0.299 (0.001)          |
| 1.8 | -6       | 4           | 2.262 (0.005)            | 0.578 (0.005)          | 2.832 (0.005)            | 0.616 (0.005)          |
|     |          | 5           | 2.199 (0.003)            | 0.492 (0.003)          | 2.703 (0.003)            | 0.513 (0.003)          |
|     |          | 6           | 2.200 (0.002)            | 0.386 (0.002)          | 2.615 (0.002)            | 0.428 (0.002)          |
|     |          | 7           | 2.223 (0.002)            | 0.366 (0.002)          | 2.562 (0.002)            | 0.360 (0.002)          |
|     |          | 8           | 2.209 (0.001)            | 0.305 (0.001)          | 2.523 (0.001)            | 0.289 (0.001)          |
| 1.8 | -3       | 4           | 2.356 (0.005)            | 0.582 (0.005)          | 2.749 (0.005)            | 0.631 (0.005)          |
|     |          | 5           | 2.283 (0.003)            | 0.475 (0.003)          | 2.668 (0.004)            | 0.527 (0.003)          |
|     |          | 6           | 2.301 (0.002)            | 0.398 (0.002)          | 2.590 (0.002)            | 0.445 (0.002)          |
|     |          | 7           | 2.302 (0.002)            | 0.379 (0.002)          | 2.545 (0.002)            | 0.359 (0.002)          |
|     |          | 8           | 2.282 (0.001)            | 0.322 (0.001)          | 2.510 (0.001)            | 0.314 (0.001)          |
| 1.8 | 0        | 4           | 2.649 (0.006)            | 0.633 (0.005)          | 2.649 (0.006)            | 0.633 (0.005)          |
|     |          | 5           | 2.553 (0.003)            | 0.479 (0.003)          | 2.553 (0.003)            | 0.479 (0.003)          |
|     |          | 6           | 2.517 (0.002)            | 0.422 (0.002)          | 2.517 (0.002)            | 0.422 (0.002)          |
|     |          | 7           | 2.495 (0.002)            | 0.350 (0.002)          | 2.495 (0.002)            | 0.350 (0.002)          |
|     |          | 8           | 2.461 (0.001)            | 0.319 (0.001)          | 2.461 (0.001)            | 0.319 (0.001)          |
| 1.8 | 3        | 4           | 2.977 (0.005)            | 0.624 (0.005)          | 2.341 (0.005)            | 0.583 (0.005)          |
|     |          | 5           | 2.833 (0.003)            | 0.545 (0.003)          | 2.288 (0.003)            | 0.477 (0.003)          |
|     |          | 6           | 2.738 (0.002)            | 0.409 (0.002)          | 2.347 (0.002)            | 0.422 (0.002)          |
|     |          | 7           | 2.643 (0.002)            | 0.351 (0.002)          | 2.349 (0.002)            | 0.360 (0.002)          |
|     |          | 8           | 2.581 (0.001)            | 0.305 (0.001)          | 2.292 (0.001)            | 0.305 (0.001)          |
| 1.8 | 6        | 4           | 3.271 (0.005)            | 0.653 (0.004)          | 2.094 (0.004)            | 0.529 (0.004)          |
|     |          | 5           | 3.044 (0.003)            | 0.471 (0.003)          | 2.078 (0.003)            | 0.471 (0.003)          |
|     |          | 6           | 2.855 (0.002)            | 0.386 (0.002)          | 2.103 (0.002)            | 0.393 (0.002)          |
|     |          | 7           | 2.732 (0.001)            | 0.334 (0.001)          | 2.097 (0.001)            | 0.318 (0.001)          |
|     |          | 8           | 2.672 (0.001)            | 0.291 (0.001)          | 2.131 (0.001)            | 0.295 (0.001)          |
| 1.8 | 10       | 4           | 3.520 (0.004)            | 0.674 (0.004)          | 1.910 (0.003)            | 0.504 (0.003)          |
|     |          | 5           | 3.185 (0.002)            | 0.496 (0.002)          | 1.942 (0.002)            | 0.434 (0.002)          |
|     |          | 6           | 3.011 (0.002)            | 0.385 (0.002)          | 1.971 (0.002)            | 0.341 (0.002)          |
|     |          | 7           | 2.861 (0.001)            | 0.320 (0.001)          | 1.993 (0.001)            | 0.313 (0.001)          |
|     |          | 8           | 2.769 (0.001)            | 0.264 (0.001)          | 2.000 (0.001)            | 0.267 (0.001)          |

**Table S4.** Summary of  $\rho'_{3c}$  and  $\Delta_L$  for anisotropic cases (2/2). For all cases,  $r_{min}/r_{max} = 0.1$ . The values in parentheses are the standard errors of the estimates. The z-axis corresponds to the symmetric axis of the transverse isotropy of the crack orientation.

| $a$ | $\kappa$ | $L/r_{max}$ | $\rho'_{3c}$<br>(z-axis) | $\Delta_L$<br>(z-axis) | $\rho'_{3c}$<br>(x-axis) | $\Delta_L$<br>(x-axis) |
|-----|----------|-------------|--------------------------|------------------------|--------------------------|------------------------|
| 2.7 | -10      | 4           | 2.228 (0.003)            | 0.545 (0.003)          | 2.842 (0.003)            | 0.548 (0.003)          |
|     |          | 5           | 2.256 (0.002)            | 0.419 (0.002)          | 2.702 (0.002)            | 0.432 (0.002)          |
|     |          | 6           | 2.217 (0.001)            | 0.360 (0.001)          | 2.675 (0.001)            | 0.361 (0.001)          |
|     |          | 7           | 2.227 (0.001)            | 0.312 (0.001)          | 2.638 (0.001)            | 0.297 (0.001)          |
|     |          | 8           | 2.265 (0.001)            | 0.275 (0.001)          | 2.579 (0.001)            | 0.271 (0.001)          |
| 2.7 | -6       | 4           | 2.266 (0.003)            | 0.527 (0.003)          | 2.823 (0.003)            | 0.549 (0.003)          |
|     |          | 5           | 2.298 (0.002)            | 0.436 (0.002)          | 2.692 (0.002)            | 0.441 (0.002)          |
|     |          | 6           | 2.262 (0.001)            | 0.366 (0.001)          | 2.661 (0.001)            | 0.362 (0.001)          |
|     |          | 7           | 2.266 (0.001)            | 0.310 (0.001)          | 2.614 (0.001)            | 0.308 (0.001)          |
|     |          | 8           | 2.291 (0.001)            | 0.296 (0.001)          | 2.560 (0.001)            | 0.278 (0.001)          |
| 2.7 | -3       | 4           | 2.368 (0.003)            | 0.567 (0.003)          | 2.795 (0.003)            | 0.566 (0.003)          |
|     |          | 5           | 2.374 (0.002)            | 0.419 (0.002)          | 2.656 (0.002)            | 0.423 (0.002)          |
|     |          | 6           | 2.351 (0.001)            | 0.385 (0.001)          | 2.633 (0.001)            | 0.366 (0.001)          |
|     |          | 7           | 2.364 (0.001)            | 0.307 (0.001)          | 2.589 (0.001)            | 0.325 (0.001)          |
|     |          | 8           | 2.360 (0.001)            | 0.301 (0.001)          | 2.545 (0.001)            | 0.279 (0.001)          |
| 2.7 | 0        | 4           | 2.706 (0.003)            | 0.576 (0.003)          | 2.706 (0.003)            | 0.576 (0.003)          |
|     |          | 5           | 2.602 (0.002)            | 0.464 (0.002)          | 2.602 (0.002)            | 0.464 (0.002)          |
|     |          | 6           | 2.563 (0.001)            | 0.378 (0.001)          | 2.563 (0.001)            | 0.378 (0.001)          |
|     |          | 7           | 2.535 (0.001)            | 0.324 (0.001)          | 2.535 (0.001)            | 0.324 (0.001)          |
|     |          | 8           | 2.497 (0.001)            | 0.278 (0.001)          | 2.497 (0.001)            | 0.278 (0.001)          |
| 2.7 | 3        | 4           | 2.954 (0.003)            | 0.571 (0.003)          | 2.425 (0.003)            | 0.558 (0.003)          |
|     |          | 5           | 2.806 (0.002)            | 0.418 (0.002)          | 2.401 (0.002)            | 0.426 (0.002)          |
|     |          | 6           | 2.735 (0.001)            | 0.353 (0.001)          | 2.382 (0.001)            | 0.348 (0.001)          |
|     |          | 7           | 2.696 (0.001)            | 0.321 (0.001)          | 2.353 (0.001)            | 0.306 (0.001)          |
|     |          | 8           | 2.629 (0.001)            | 0.263 (0.001)          | 2.363 (0.001)            | 0.280 (0.001)          |
| 2.7 | 6        | 4           | 3.164 (0.002)            | 0.560 (0.002)          | 2.178 (0.002)            | 0.491 (0.002)          |
|     |          | 5           | 2.974 (0.002)            | 0.411 (0.002)          | 2.150 (0.002)            | 0.394 (0.002)          |
|     |          | 6           | 2.839 (0.001)            | 0.350 (0.001)          | 2.166 (0.001)            | 0.328 (0.001)          |
|     |          | 7           | 2.765 (0.001)            | 0.293 (0.001)          | 2.178 (0.001)            | 0.292 (0.001)          |
|     |          | 8           | 2.706 (0.001)            | 0.242 (0.001)          | 2.182 (0.001)            | 0.265 (0.001)          |
| 2.7 | 10       | 4           | 3.413 (0.002)            | 0.518 (0.002)          | 2.008 (0.002)            | 0.468 (0.002)          |
|     |          | 5           | 3.115 (0.001)            | 0.393 (0.001)          | 1.992 (0.001)            | 0.376 (0.001)          |
|     |          | 6           | 2.936 (0.001)            | 0.325 (0.001)          | 2.043 (0.001)            | 0.321 (0.001)          |
|     |          | 7           | 2.837 (0.001)            | 0.281 (0.001)          | 2.057 (0.001)            | 0.291 (0.001)          |
|     |          | 8           | 2.754 (0.001)            | 0.233 (0.001)          | 2.079 (0.001)            | 0.247 (0.001)          |

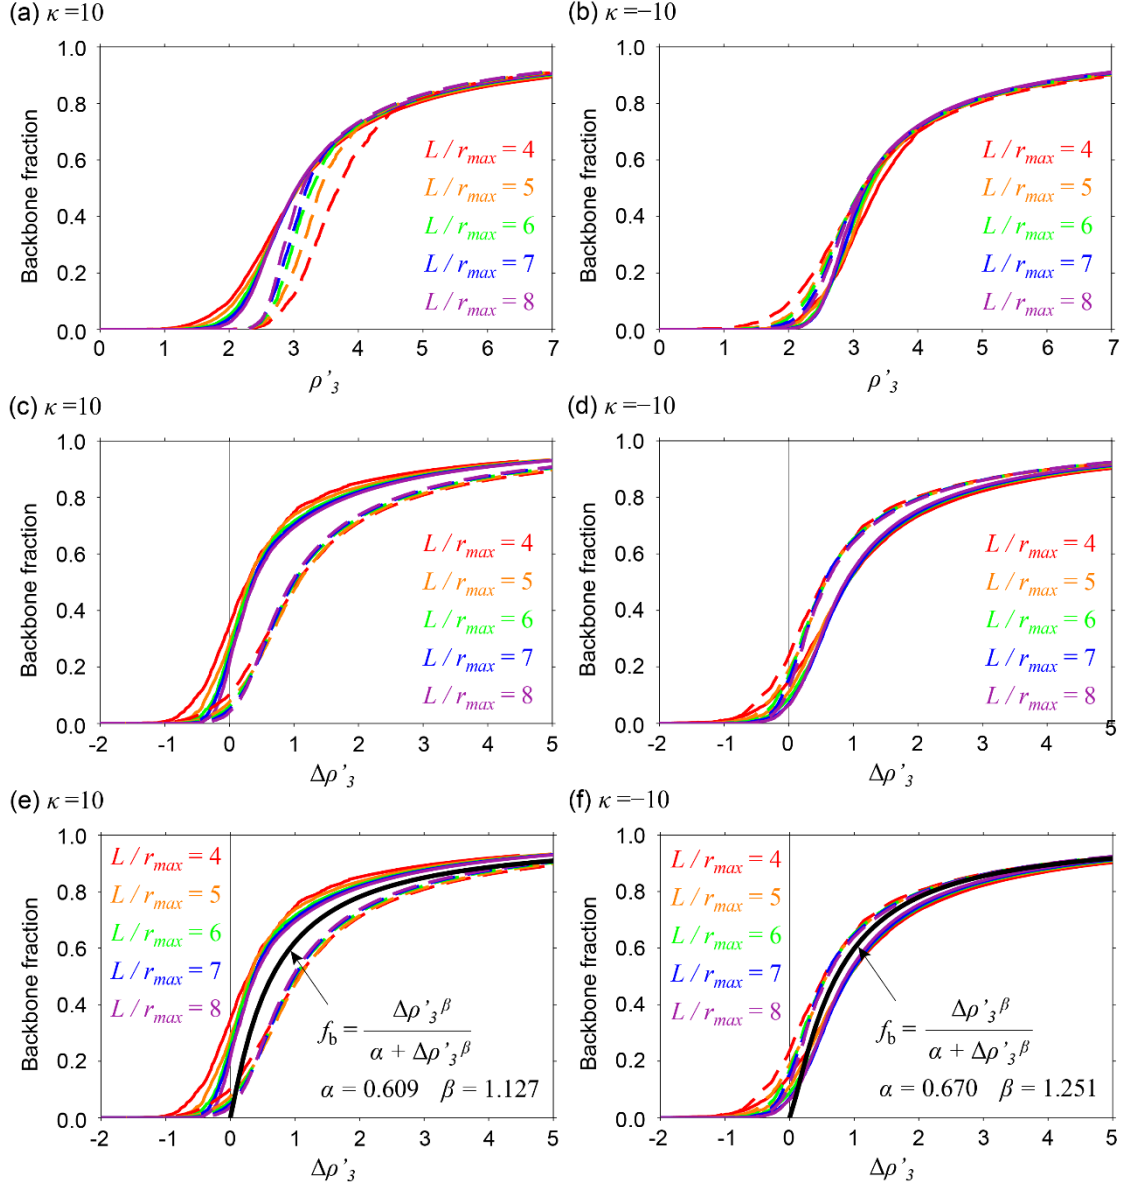

**Figure S1.** Backbone fractions of the anisotropic cases in which  $\kappa=\pm 10$ ,  $a=2.7$ , and  $r_{\min}/r_{\max}=0.1$  under the assumption of a constant crack aspect ratio. The solid-colored lines are the backbone fractions for the direction parallel to the symmetric axis of anisotropy, i.e., the z-axis, whereas the broken lines are those for the direction perpendicular to the symmetric axis. The horizontal axes of (a) and (b) are  $\rho'_3$ , whereas those of the other panels are  $\Delta\rho'_3(=\rho'_c-\rho'_{3c})$ . The solid black lines in (e) and (f) are the backbone fraction extrapolated for  $L/r_{\max}=\infty$ , which is based on Eq. (11) in the main text.
